# Supplementary material for: Factors Influencing Service Use Among Homeless Youths With Co-Occurring Disorders
Source: Atypon-hosted journal article supplement (doi:10.1176/appi.ps.201200257), 2013-09-01
Supplement: 925_ds001.pdf [file 925_ds001.pdf]

**Standardized questions for focus group interviews**

1. What services or programs for people with mental health and alcohol or drug problems do you know of?
2. How did you get connected with services?
  - a. What made you decide to seek treatment?
  - b. Did someone help with that connection?
3. Describe the program(s) that have been most helpful for your mental health and drug or alcohol problem.
  - a. What made that program(s) work?
  - b. Was there anything else in your life that helped you stick with the program(s) or helped it to work for you?
4. What has made it difficult to get help for your mental health and alcohol or drug problems when you needed it?
  - a. What has made it difficult to *seek* help when you needed it?
5. Think of a service or program(s) that did not work for you. What about that program(s) didn't work?
  - a. Was there anything else in your life at the time that made it harder to stick with the program(s)?
6. Do you think anyone with a mental health and drug or alcohol problem in the Toronto area can get help? Why or why not?
7. What are the top two biggest barriers to getting help for your mental health and drug or alcohol problem?
8. What do you think the people who plan services for youths with mental health and drug or alcohol problems should know?
9. Do you have any final comments?

## Factors affecting service use among homeless youths with co-occurring disorders

| Factors affecting service use                         | Example participant quote                                                                                                                                                                                                                       |
|-------------------------------------------------------|-------------------------------------------------------------------------------------------------------------------------------------------------------------------------------------------------------------------------------------------------|
| <b>Individual factors</b>                             |                                                                                                                                                                                                                                                 |
| Motivation                                            |                                                                                                                                                                                                                                                 |
| Readiness for change                                  | I keep trying to deny things, and keep thinking I can just move on.                                                                                                                                                                             |
| Taking action                                         | People are not gonna come up to you and ask what your problems are...There's help available—it's up to you to go and make use of the help.                                                                                                      |
| Support                                               |                                                                                                                                                                                                                                                 |
| Family and peer support                               | A third time [I got clean], I had a lot of help from friends and family. Like, if it wasn't for them, I don't know what I would have done.                                                                                                      |
| Peers as role models and advisors                     | I had a friend who was in the same situation as me, and she found her way out. So I ask her for advice, every now and then.                                                                                                                     |
| Therapeutic relationship                              |                                                                                                                                                                                                                                                 |
| Positive impression of service provider               | I go to [the clinic psychiatrist] 'cause I like her – she's cool, it's confidential, and I get an hour to just talk to someone who has actually gone through training...Might just have some options for you.                                   |
| Consistency                                           | That's one thing that's so important to us, is that we have some sort of familiar recognition of something. If we see the same kind of worker coming in here regularly, we can more open up to that person.                                     |
| Persistence                                           | [My caseworker]...went above and beyond...Calling me when I wouldn't return her call...It took a long time for me to come around. And she was really persistent with me...Helped me get through a lot of stuff.                                 |
| Relatability                                          | I find it's better when...someone's coming to me and saying "yeah, I've smoked that, I've done this, I've done that," rather than someone [who doesn't] know the first thing about it.                                                          |
| <b>Program factors</b>                                |                                                                                                                                                                                                                                                 |
| Flexible and comprehensive services                   |                                                                                                                                                                                                                                                 |
| Individualized                                        | What about you? What are you going through? What do you need? It just feels more comfortable.                                                                                                                                                   |
| Minimal structural barriers                           | If you really needed help and you came [to this clinic] and said "listen, I don't have my health card," they'd still see you.                                                                                                                   |
| Address basic needs                                   | They really understand that...you can't be trying to get through the issues you need to when you have nowhere to live and when you don't know where your next dollar's gonna come from.                                                         |
| Engagement through recreation and vocational services | The only thing that worked for me was a program that has nothing to do with mental or substance abuse...It's a program in [the youth shelter], and you do art – draw, paint...Try to do something, but if you don't want to, they take it easy. |
| Integration                                           | I would see separate people about my drug problems. I would make sure they didn't tell my psychiatrist ...They                                                                                                                                  |

|                                         |                                                                                                                                                                                                                                                                                                                                                           |
|-----------------------------------------|-----------------------------------------------------------------------------------------------------------------------------------------------------------------------------------------------------------------------------------------------------------------------------------------------------------------------------------------------------------|
|                                         | didn't really ask about...they didn't think I did drugs...[The local psychiatric hospital] distinctly asks if you have both [mental health and substance use problems] and you want to work on both...If they're not asking, like a youth isn't really driven to be like, "oh, I'm also feeling a little crazy" or "I'm also feeling like a drug addict." |
| One-stop shop                           | You're going to five different programs to get one thing you need.                                                                                                                                                                                                                                                                                        |
| Availability of harm reduction services |                                                                                                                                                                                                                                                                                                                                                           |
| Problems with abstinence policies       | If...I'm high and they know it, I would get kicked out, right? But how is that really helping me?...If you come home...drunk or under the influence, that's the time you need somebody to take you in the most.                                                                                                                                           |
| Temptation from peer use of substances  | It rubs off on you and young people are totally exposed, the way they see things, they're gonna wanna do those things, right?                                                                                                                                                                                                                             |
| <b>Systemic factors</b>                 |                                                                                                                                                                                                                                                                                                                                                           |
| Stigma                                  |                                                                                                                                                                                                                                                                                                                                                           |
| Societal                                | You feel like a freak. [The local psychiatric hospital] is associated with all these people walking around talking to themselves...There's no like place where you still feel kinda normal.                                                                                                                                                               |
| Service providers                       | They see you...as somebody who has a drug problem, and could be a potential client, and that's it. They don't look at you and say, "this guy just went through a journey, he's using drugs, it's hurting him...he really wants to stop using. What's causing him to do that?"                                                                             |
| Accessibility                           |                                                                                                                                                                                                                                                                                                                                                           |
| Inclusive                               | When I was in detox...they tell me as I go try to get into different rehabs that I'm not qualified. Am I not a big enough drug addict to get into a rehab?                                                                                                                                                                                                |
| Wait times                              | How are you going to make [accessing services] a long process? This person along the way is going to get tempted, is gonna break, is gonna get depressed – something's bound to happen.                                                                                                                                                                   |
| Connections through other sectors       | People that do have addictions to drugs...they get out from jail, they don't get any help...Put them out on the street, they're just going to go back and use again...Why not say, "kay, you want to go to detox? Do you want help?"                                                                                                                      |
| Continuity of services                  | When I wanted to go to rehab, I basically had to go to detox, then wait until there was an opening at the rehab center...I relapsed in the time I had to wait to get in.                                                                                                                                                                                  |
